# Supplementary material for: Study of the Metatranscriptome of Eight Social and Solitary Wild Bee Species Reveals Novel Viruses and Bee Parasites
Source: Front Microbiol. 2018 Feb 14;9:177. doi: 10.3389/fmicb.2018.00177 (PMC5817871; doi:10.3389/fmicb.2018.00177)
Supplement: Supplementary file 5 [file Data_Sheet_2.XLSX]

## Sheet: Picornavirales
Order	Family	Subfamily	Genus	Species	Type?	Strain	Acronym	Taxid	Genome	G.len	PMID	NS polyprotein
Picornavirales	Dicistroviridae	-	Aparavirus	Acute bee paralysis virus	yes	genomic	ABPV	92444	NC_002548.1	9491	11080493	NP_066241.1
				Israeli acute paralysis virus	no	genomic	IAPV	294365	NC_009025.1	9499	18024913	YP_001040002.1
				Kashmir bee virus	no	genomic	KBV	68876	NC_004807.1	9524	15269367	NP_851403.1
				Solenopsis invicta virus-1	no	genomic	SINV1	294369	NC_006559.1	8026	15380366	YP_164440.1
			Cripavirus	Aphid lethal paralysis virus	no	genomic	ALPV	209529	NC_004365.1	9812	12466490	NP_733845.1
				Cricket paralysis virus	yes	genomic	CrPV	12136	NC_003924.1	9185	10866656	NP_647481.1
				Drosophila C virus	no	genomic	DCV	64279	NC_001834.1	9264	9460942	NP_044945.1
			Triatovirus	Black queen cell virus	no	genomic	BQCV	92395	NC_003784.1	8550	10900051	NP_620564.1
				Himetobi P virus	no	genomic	HiPV	81583	NC_003782.1	9275	10550677	NP_620560.1
				Triatoma virus	yes	genomic	TrV	103442	NC_003783.1	9010	10725445	NP_620562.1
	Iflaviridae	-	Iflavirus	Deformed wing virus	no	genomic	DWV	198112	NC_004830.2	10140	16641291	NP_853560.2
				Dinocampus coccinellae paralysis virus	no	genomic	DcPV	1541119	NC_025835.1	10192	25673681	YP_009111311.1
				Infectious flacherie virus	yes	genomic	IFV	12742	NC_003781.1	9650	9505971	NP_620559.1
				Sacbrood virus	no	genomic	SBV	89463	NC_002066.1	8832	10374974	NP_049374.1
				Slow bee paralysis virus	no	genomic	SBPV	458132	NC_014137.1	9505	20519455	YP_003622540.1
				Varroa destructor virus-1	no	genomic	VDV1	232800	NC_006494.1	10112	15557248	YP_145791.1
	Marnaviridae	-	Marnavirus	Heterosigma akashiwo RNA virus	yes	genomic	HaRNAV	324900	NC_005281.1	8587	15016544	NP_944776.1
	Picornaviridae	-	Ampivirus	Amivirus A	yes	Amivirus A1	AVA1	1661395	NC_027214.1	9246	26018961	YP_009143521.1
			Enterovirus	Enterovirus C	yes	Human enterovirus C	EV-C	138950	NC_002058.3	7440	many	NP_041277.1
			Mosavirus	Mosavirus A	yes	genome	MVA	1481452	NC_023987.1	8398	24824348	YP_009026384.1
			Torchivirus	Torchivirus A	yes	Tortoise picornavirus	ToPV	1578826	NC_025890.1	7093	25430906	YP_009111338.1
	Secoviridae	Comovirinae	Comovirus	Cowpea mosaic virus	yes	genomic	CPMV	12264	NC_003549.1	9370	16453487	NP_613283.1	segmented
			Fabavirus	Broad bean wilt virus 1	yes	genomic	BBWV1	50817	NC_005289.1	9263	10481749	NP_945134.1	segmented
				Prune virus F	no	genomic	PVF	1855510	KX269868.1	8957	27815695	ANH71250.1	segmented
			Nepovirus	Tobacco ringspot virus	yes	genomic	TRSV	12282	NC_005097.1	11443	8623518	NP_919040.1	segmented
				Cherry leaf roll virus	no	genomic	CLRV	12615	NC_015414.1	14278	22230314	YP_004382746.1	segmented
				Arabis mosaic virus	no	genomic	AMV	12271	NC_006057.1	11154	15098112	YP_053925.1	segmented
		-	Cheravirus	Cherry rasp leaf virus	yes	genomic	CRLV	202566	NC_006271.1	10349	15503203	YP_081444.1	segmented
			Sadwavirus	Satsuma dwarf virus	yes	genomic	SDV	47416	NC_003785.2	12138	10092021	NP_734025.1	segmented
			Sequivirus	Parsnip yellow fleck virus	yes	genomic	PYFV	12777	NC_003628.1	9871	1469358	NP_734447.1	unsegmented
			Torradovirus	Tomato torrado virus	yes	genomic	ToTV	370833	NC_009013.1	13211	17226066	YP_001039627.1	segmented
			Waikavirus	Rice tungro spherical virus	yes	genomic	RTSV	35287	NC_001632.1	12226	8460478	NP_042507.1	unsegmented
			Unassigned	Strawberry latent ringspot virus	no	genomic	SLRSV	28351	NC_006964.1	11338	16837095	YP_227373.1	segmented
	Unassigned	-	Bacillarnavirus	Rhizosolenia setigera RNA virus 01	yes	genomic	RsRNAV	359987	NC_018613.1	8877	14766545	YP_006732323.1	unsegmented
			Labyrnavirus	Aurantiochytrium single-stranded RNA virus 01	yes	genomic	AuRNAV	674971	NC_007522.1	9035	16476996	YP_392465.1	unsegmented

## Sheet: Tymovirales
Order	Family	Subfamily	Genus	Species	Type?	Strain	Acronym	Taxid	Genome	G.len	PMID	RdRP ORF
Tymovirales	Alphaflexiviridae	-	Allexivirus	Shallot virus X	yes	genomic	ShVX	31770	NC_003795.1	8832	1339468	NP_620648.1
			Botrexvirus	Botrytis virus X	yes	genomic	BVX	174142	NC_005132.1	6966	16172841	NP_932306.1
			Lolavirus	Lolium latent virus	yes	genomic	LoLV	365150	NC_010434.1	7674	18509590	YP_001718499.1
			Mandarivirus	Indian citrus ringspot virus	yes	genomic	ICRSV	104664	NC_003093.1	7560	12417955	NP_203553.1
			Platypuvirus	Donkey orchid symptomless virus	yes	genomic	DOSV	1400526	NC_022894.1	7838	24223974	YP_008828152.1
			Potexvirus	Potato virus X	yes	genomic	PVX	12183	NC_011620.1	6435	3404114	YP_002332929.1
			Sclerodarnavirus	Sclerotinia sclerotiorum debilitation-associated RNA virus	yes	genomic	SsDRV	213034	NC_007415.1	5470	16361437	YP_325662.1
	Betaflexiviridae	Quinvirinae	Carlavirus	Aconitum latent virus	no	genomic	ALV	101764	NC_002795.1	8657	12038696	NP_116487.1
			Foveavirus	Apple stem pitting virus	yes	genomic	ASPV	35350	NC_003462.2	9332	8021584	NP_604464.1
			Robigovirus	Cherry rusty mottle associated virus	no	genomic	CRMaV	1312929	NC_020996.1	8397	23525699	YP_007761581.1
		Trivirinae	Capillovirus	Apple stem grooving virus	yes	genomic	ASGV	28347	NC_001749.2	6495	1413530	NP_044335.1
				Cherry virus A	no	genomic	CVA	42882	NC_003689.1	7383	7636482	NP_620106.1
			Chordovirus	Carrot Ch virus 1	yes	genomic	CChV1	1425363	NC_025469.1	8155		YP_009103999.1
			Citrivirus	Citrus leaf blotch virus	yes	genomic	CLBV	129141	NC_003877.1	8747	11504557	NP_624333.1
			Divavirus	Diuris virus A	yes	genomic	DVA	1247115	NC_019029.1	6956	23089850	YP_006905850.1
			Prunevirus	Apricot vein clearing associated virus	yes	Tas3	AVCaV	1343920	NC_023295.1	7315	24389094	YP_008997790.1
			Tepovirus	Potato virus T	yes	genomic	PVT	36403	NC_011062.1	6539		YP_002019748.1
			Trichovirus	Apple chlorotic leaf spot virus	yes	genomic	ACLSV	12175	NC_001409.1	7555	2219716	NP_040551.1
			Vitivirus	Grapevine virus F	yes	genomic	GVF	1221437	NC_018458.1	7551	22879616	YP_006590065.1
	Gammaflexiviridae	-	Mycoflexivirus	Botrytis virus F	yes	genomic	BVF	129395	NC_002604.1	6827	11125160	NP_068549.1
	Tymoviridae	-	Maculavirus	Grapevine fleck virus	yes	genomic	GFkV	103722	NC_003347.1	7564	11458008	NP_542612.1
				Bombyx mori Macula-like virus	no	genomic	BmMLV	288456	NC_015524.1	6519	15827172	YP_004464930.1
				Culex originated Tymoviridae-like virus		genomic	CuTLV	1236047	NC_018703.1	6471	22848363	YP_006843893.1
			Marafivirus	Maize rayado fino virus	yes	genomic	MRFV	59749	NC_002786.1	6305	11289816	NP_115454.1
			Tymovirus	Turnip yellow mosaic virus	yes	genomic	TYMV	12154	NC_004063.1	6318	3399388	NP_663297.1
				Poinsettia mosaic virus	-	genomic	PMV	113553	NC_002164.1	6099	10860883	NP_037647.1
				Bee Macula-like virus syn. VdMLV	-	genomic	BeeMLV	1682186	NC_027631.1	6258	26154017	YP_009160324.1
				Varroa Tymo-like virus	-	genomic	VTLV	1682187	NC_027619.1	6169	26154017	YP_009159826.1

## Sheet: Parvoviridae
Family	Subfamily	Genus	Species	Type?	Strain	Acronym	Taxid	Genome	G.len	PMID	NSP1 ("NS1")	Blastp%	SP ("VP1")
Parvoviridae	Densovirinae	Ambidensovirus	Asteroid ambidensovirus 1	no	Sea star-associated densovirus	SSaDNV	1979755	KM052275.1	5050	25404293	AIQ82699.1	30	AIQ82698.1
			Blattodean ambidensovirus 1	no	Periplaneta fuliginosa densovirus	PfDNV	1513184	NC_000936.1	5454	11332273	NP_051020.1	29	NP_051017.1
			Blattodean ambidensovirus 2	no	Blattella germanica densovirus 1	BgDNV	220638	NC_005041.2	5335	16690920	NP_874381.1	28	AAO38886.2
			Decapod ambidensovirus 1	no	Cherax quadricarinatus densovirus	CqDNV	1642018	NC_026943.1	6334	26268797	YP_009134732.1	30	YP_009134734.1
			Dipteran ambidensovirus 1	no	Culex pipiens densovirus	CpDNV	185638	NC_012685.1	5759	19386710	YP_002887625.1	32	YP_002887627.1
			Hemipteran ambidensovirus 1	no	Planococcus citri densovirus	PcDNV	159153	NC_004289.1	5380	11685517	NP_694843.1	26	ARV85907.1
			Hemipteran ambidensovirus 2	no	Dysaphis plantaginea densovirus	DpDNV	551224	NC_034532.1	4981	19439653	YP_009362129.1	31	YP_009362131.1
			Hemipteran ambidensovirus 3	no	Myzus persicae nicotianae densovirus	MpDNV	210016	NC_005040.1	5499	12533713	NP_874376.1	24-36	NP_874377.1
			Hymenopteran ambidensovirus 1	no	Solenopsis invicta densovirus	SiDNV	1414671	NC_022748.1	5280	Valles2013	YP_008766862.1	28	YP_008766863.1
			Lepidopteran ambidensovirus 1	no	Galleria mellonella densovirus	GmDNV	37138	NC_004286.1	6039	12970420	NP_899650.1	31	NP_694830.1
				yes	Junonia coenia densovirus	JcDNV	12524	NC_004284.1	5908	1413502	NP_694824.1	30	NP_694823.1
			Orthopteran ambidensovirus 1	no	Acheta domestica densovirus	AdDNV	185639	NC_004290.1	5234	21775445	AGO32185.1	27	AGO32187.1
		Brevidensovirus	Dipteran brevidensovirus 1	yes	Aedes aegypti densovirus 2	AeDNV-2	1513196	NC_012636.1	3776	19332994	YP_002854229.1	20	YP_002854231.1
			Dipteran brevidensovirus 2	no	Aedes albopictus densovirus 2	AaDNV-2	1513199	NC_004285.1	4176	8178459	NP_694827.1	20	NP_694829.3
		Hepandensovirus	Decapod hepandensovirus 1	yes	Fenneropenaeus chinensis hepandensovirus	FcHDNV	797418	NC_014357.1	6085	-	YP_003799994.1	21	AEQ64893.1
		Iteradensovirus	Lepidopteran iteradensovirus 1	yes	Bombyx mori densovirus 5	BmDNV-5	10809	NC_004287.1	5078	-	NP_694834.1	29	NP_694837.1
			Lepidopteran iteradensovirus 2	no	Casphalia extranea densovirus	CeDNV	180586	NC_004288.1	5002	11878932	NP_694838.1	29	NP_694840.1
			Lepidopteran iteradensovirus 3	no	Dendrolimus punctatus densovirus	DpuDNV	292208	NC_006555.1	5039	16033964	YP_164339.1	30	YP_164341.1
			Lepidopteran iteradensovirus 4	no	Papilio polyxenes densovrius	PpDNV	1221208	NC_018450.1	5053	22879608	YP_006589928.1	31	YP_006589930.1
			Lepidopteran iteradensovirus 5	no	Helicoverpa armigera densovirus	HaDNV	1045778	NC_015718.1	4926	22966197	YP_004678720.1	33	AFK91983.1
		Penstyldensovirus	Decapod penstyldensovirus 1	yes	Penaeus stylirostris penstyldensovirus 1	PsPDNV-1	1513225	AF273215.1	3873	8277269	AAG10007.2	23
		Unassigned	Orthopteran densovirus 1	-	Acheta domestica mini ambidensovirus	AdmDNV	1404345	NC_022564.1	4945	24201197	YP_008658568.1	24	YP_008658570.1
		Unclassified	Diaphorini citri densovirus	-	Diaphorina citri densovirus	DcDNV	1776153	NC_030296.1	5071	27469948	YP_009256211.1	35	YP_009256212.1
			CaaDV1		CH-OY-1	CaaDNV-1	1979848	KY548840.1	5860	28342032	ARI46481.1	30	ARI46484.1
			Diatraea saccharalis densovirus	-		DsDNV	72003	NC_001899.1	5941	unpubl.	NP_046813.1	30	NP_046815.1
			Lone star tick densovirus 1		isolate RTS55	LstDNV-1	2027355	KX774632.1	4436	unpubl.	ASU47551.1	31	ASU47552.1
			Viltain virus		isolate DrosEU07_viltain_2014	VILV	1955787	KX648535.1	5025	unpubl.	AQN78648.1	29	AQN78647.1
			Linvill Road virus	no	isolate LivillRoadVirus_Pennsylvania.K_11_1	LINV	1955785	KX648536.1	4878	unpubl.	AQN78650.1	29	AQN78650.1
	Parvovirinae	Amdoparvovirus	Carnivore amdoparvovirus 1	yes	Aleutian mink disease virus	AMDV	28314	NC_001662.1	4801	2161958	NP_042872.1	29
		Aveparvovirus	Galliform aveparvovirus 1	yes	Galliform aveparvovirus 1	ChPV	1511865	NC_024452.1	5257	20097398	YP_009046818.1	35
		Bocaparvovirus	Ungulate bocaparvovirus 1	yes	Bovine parvovirus	BPV	10784	NC_001540.1	5517	3783814	NP_041402.1	21-30	NP_041404.1
		Copiparvovirus	Ungulate copiparvovirus 1	yes	Bovine parvovirus-2	BPV-2	172296	NC_006259.1	5610	11562506	YP_077175.1	21	YP_077176.1
		Dependoparvovirus	Adeno-associated dependoparvovirus A	yes	Adeno-associated virus-1	AaV-1	85106	NC_002077.1	4718	10196295	NP_049541.1	30	NP_049542.1
		Erythroparvovirus	Primate erythroparvovirus 1	yes	Human parvovirus B19	B19	10798	NC_000883.2	5596	14972543	YP_004928144.1	27	YP_004928146.1
		Protoparvovirus	Rodent protoparvovirus 1	yes	Minute virus of mice	MVM	10794	NC_001510.1	5149	6298737	NP_041242.1	28	NP_041244.1
		Tetraparvovirus	Primate tetraparvovirus 1	yes	Human parvovirus 4 G1	PARV-4	1511919	NC_007018.1	5268	15956568	YP_238482.1	29	YP_238483.1

## Sheet: Sobemo-like viruses
Order	Family	Subfamily	Genus	Species	Type?	Strain	Acronym	Taxid	Genome	G.len	PMID	RdRP ORF
-	Luteoviridae	-	Enamovirus	Pea enation mosaic virus 1	yes	genomic	PEMV1	193121	NC_003629.1	5706	1875194	NP_620026.2
			Luteovirus	Barley yellow dwarf virus-PAV	yes	GAV	BYDV-GAV	12040	NC_004750.1	5677	3399386	AAO65185.1
			Polerovirus	Potato leafroll virus	yes	genomic	PLRV	12045	NC_001747.1	5987	2732710	NP_056748.3
	Astroviridae	-	Avastrovirus	Avastrovirus 1	yes	genomic	AV1	1239437	NC_002470.1	7003	12573498	CAB95006.3
			Mamastrovirus	Mamastrovirus 1	yes	genomic	MAV1	1239565	-	6743	8021608	BAU68080.1
	Barnaviridae	-	Barnavirus	Mushroom bacilliform virus	yes	genomic	MBV	32625	NC_001633.1	4009	8030251	NP_042510.2
	Tombusviridae	-	Alphacarmovirus	Carnation mottle virus	yes	isolate Shanghai	CMV-Sh	652111	-	-	-	Q9J5U7.1
			Alphanecrovirus	Tobacco necrosis virus A	yes	genomic	TNV-A	12055	NC_001777.1	3684	2371773	NP_056825.2
			Aureusvirus	Pothos latent virus	yes	genomic	PLV	44562	NC_000939.2	4415	7595391	YP_009032634.1
			Avenavirus	Oat chlorotic stunt virus	yes	genomic	OCSV	146762	NC_003633.1	4114	7636483	NP_619751.1
			Betacarmovirus	Turnip crinkle virus	yes	genomic	TCV	11988	NC_003821.3	4054	2718381	NP_620720.3
			Betanecrovirus	Tobacco necrosis virus D	yes	genomic	TNV-D	12056	NC_003487.1	3762	9191913	NP_608311.1
			Dianthovirus	Carnation ringspot virus	yes	genomic	CRSV	12268	NC_003530.1	5243	8113736	NP_619711.1	bipartite
			Gallantivirus	Galinsoga mosaic virus	yes	genomic	GaMV	60714	NC_001818.1	3803	9505975	NP_044732.1
			Gammacarmovirus	Melon necrotic spot virus	yes	genomic	MeNSV	11987	NC_001504.1	4266	2212985	NP_041226.1
			Macanavirus	Furcraea necrotic streak virus	yes	genomic	FNSV	676234	NC_020469.1	3966	unpubl.	YP_007517174.1
			Machlomovirus	Maize chlorotic mottle virus	yes	genomic	MCMV	12138	NC_003627.1	4437	2726455	NP_619718.1
			Panicovirus	Panicum mosaic virus	yes	genomic	PMV	40279	NC_002598.1	4326	9454725	NP_068342.1
			Pelarspovirus	Pelargonium line pattern virus	yes	genomic	PLPV	167019	NC_007017.2	3883	15645374	YP_238475.1
			Tombusvirus	Tomato bushy stunt virus	yes	genomic	TBSV	12145	NC_001554.1	4776	2353450	NP_062897.1
			Umbravirus	Carrot mottle virus	yes	genomic	CMoV	68033	NC_011515.1	4193	unpubl.	YP_002302259.1
			Zeavirus	Maize necrotic streak virus	yes	genomic	MaNSV	137556	NC_007729.1	4094	16545417	YP_459920.2
	Unclassified	-	-	Ixodes scapularis associated virus 2		isolate A1	IsAV2	1526526	KM048319.1	2334	25056893	AII01812.1
				Wenzhou sobemo-like virus 4		genomic	WeSLV4	1923660	NC_033138.1	2961	27880757	YP_009337376.1
				Hubei mosquito virus 2		genomic	HuMV2	1922926	NC_033305.1	4811	27880757	YP_009337877.1	bipartite
				Baird Spence virus		UW	BSV-UW	1911089	KX138223.1	2584	unpubl.	AOX15243.1
				Motts Mill virus			MMV	1654359	KP714076.1	4397	26172158	AKH40291.1
				Barns Ness beadlet anemone sobemo-like virus 1		C96	BNBASLV1	2021923	MF189984.1	4334	unpubl.	ASM94004.1
	Nodaviridae	-	Alphanodavirus	Nodamura virus	yes	genomic	NoV	12288	NC_002690.1	4540	12573589	NP_077730.1	bipartite
			Betanodavirus	Striped jack nervous necrosis virus	yes	genomic	SJNNV	35297	NC_003448.1	4528	11602777	NP_599247.1	bipartite
			unclassified	Drosophila melanogaster American nodavirus		SW-2009a	ANV	663279	GQ342965.1	4523	20080648	ACU32794.1	bipartite
				Lonestar tick nodavirus		RTS54	LTNV	2027377	KX774634.1	4310	unpubl.	ASU47554.1	bipartite
	-	-	Sobemovirus	Southern bean mosaic virus	yes	genomic	SBMV	12139	NC_004060.2	4132	21855544	YP_007438858.2	monopartite
				Rice yellow mottle virus	no	genomic	RYMV	31744	NC_001575.2	4449	21068217	YP_007500964.1	monopartite
				Turnip rosette virus	no	genomic	TuRV	218923	NC_004553.3	4086	23830075	YP_008869286.1	monopartite

## Sheet: Nege-like viruses
Order	Family	Subfamily	Genus	Species	Type?	Strain	Acronym	Taxid	Genome	G.len	PMID	RdRP ORF
-	Virgaviridae	-	Furovirus	Soil-borne wheat mosaic virus	yes	Nebraska	SBWMV	652673	none	none	8317092	Q89249.1	bipartite
			Goravirus	Gentian ovary ringspot virus	yes	genomic	GORSV	1920772	NC_024501.1	9388	25351517	YP_009047252.1	bipartite, manually added YP_009047251.1
			Hordeivirus	Barley stripe mosaic virus	yes	genomic	BSMV	12327	NC_003478.1	10221	3590624	NP_604481.1	tripartite, manually added NP_604474.1
			Pecluvirus	Peanut clump virus	yes	genomic	PCV	28355	NC_003672.1	10401	8317107	NP_620047.1	bipartite
			Pomovirus	Potato mop-top virus	yes	genomic	PMTV	37128	NC_003723.1	12141	10573175	NP_620444.1	tripartite
			Tobamovirus	Tobacco mosaic virus	yes	genomic	TMV	12242	NC_001367.1	6395	6964389	NP_597747.1	monopartite, manually added NP_056764.1
			Tobravirus	Tobacco rattle virus	yes	genomic	TRV	12295	NC_003805.1	10646	7595393	NP_620669.1	bipartite
	Unassigned		Higrevirus	Hibiscus green spot virus	yes	genomic	HGSV	1100890	NC_016141.1	14702	21916557	YP_004928118.1	tripartite
			Blunervirus	Blueberry necrotic ring blotch virus	yes	genomic	BNRBV	1094249	NC_016084.1	14153	23486668	YP_004901701.1	quadripartite
			Cilevirus	Citrus leprosis virus C	yes	genomic	CiLV-C	347219	NC_008169.1	13731	16894213	YP_654538.1	bipartite
			-	Fort Crockett virus		genomic	FCV	1955198	NC_034157.1	7903	28193550	YP_009351834.1	monopartite
	Unclassified		Nelorpivirus	Ngewotan virus		isolate JKT9982	NWTV	1265748	JQ686833.1	9226	23255793	AFY98072.1	monopartite
				Negev virus		genomic	NEGV	1170424	NC_030294.1	9537	27671777	YP_009256205.1	monopartite
				San Bernardo virus		genomic	SBDV	1955199	NC_034154.1	9748	28193550	YP_009351827.1	monopartite
				Brejeira virus		genomic	BREJV	1552662	NC_030743.1	9863	25792052	YP_009270625.1	monopartite
				Piura virus		genomic	PIUV	1170425	NC_034155.1	10050	28193550	YP_009351830.1	monopartite
				Big Cypress virus		genomic	BCPV	1955196	NC_034152.1	9506	28193550	YP_009351821.1	monopartite
				Loreto virus		genomic	LORV	1170422	NC_034158.1	9136	28193550	YP_009351835.1	monopartite
				Cordoba virus		genomic	CDBV	1955175	NC_034156.1	7615	28193550	YP_009351833.1	monopartite
			Sandewavirus	Tanay virus		genomic	TANV	1489714	NC_024071.1	9578	24646751	YP_009028558.1	monopartite
				Wallerfield virus		genomic	WALV	1457165	NC_023440.1	9023	24262627	YP_009001772.1	monopartite
				Goutanap virus		genomic	GANV	1560351	NC_025357.1	9165	25398046	YP_009094126.1	monopartite
				Dezidougou virus		Ara 20086	DEZV	1170421	JQ675604.1	9290	23255793	AFI24669.1	monopartite
				Biratnagar virus		genomic	BIRV	1955197	NC_034153.1	9111	28193550	YP_009351824.1	monopartite
				Santana virus		BeAR 517449	SANV	1170427	JQ675606.1	9266	23255793	AFI24675.1	monopartite
			-	Shayang virga-like virus 1		genomic	ShVLV1	1923463	NC_032438.1	12384	27880757	YP_009333208.1L	monopartite
				Xingshan nematode virus 1		genomic	XsNV1	1923760	NC_032483.1	11374	27880757	YP_009333310.1	monopartite
				Xinzhou nematode virus 1		genomic	XzNV1	1923769	NC_033728.1	11525	27880757	YP_009345041.1	monopartite
				Muthill virus		isolate dimm_PoolSeq2	MhV	1807803	KU754517.1	10593	27375356	AMO03223.1	monopartite
				Adelphocoris suturalis virus		genomic	ASV1	1930920	NC_032728.1	10845	28108803	YP_009336476.1	monopartite
				Boutonnet virus		isolate Muscid_PoolSeq1	BOUV	1807816	KU754539.1	10208	27375356	AMO03254.1	monopartite
				Hubei virga-like virus 9		genomic	HuVLV9	1923342	NC_032765.1	10976	27880757	YP_009336553.1	monopartite
				Buckhurst virus		isolate Dobs_PoolSeq3	BhV	1807802	KU754516.1	11139	27375356	AMO03221.1	monopartite
				Bofa virus		isolate EK_PoolSeq2	BOFV	1807762	KU754515.1	10726	26172158	AMO03256.1	monopartite

## Sheet: Toti-like viruses
Order	Family	Subfamily	Genus	Species	Type?	Strain	Acronym	Taxid	Genome	G.len	PMID	RdRP ORF
-	Totiviridae	-	Giardiavirus	Giardia lamblia virus	yes	genomic	GLV	29255	NC_003555.1	6277	8378334	NP_620070.1	monopartite
			Leishmaniavirus	Leishmania RNA virus 1	yes	1-1	LRV1	1678905	NC_002063.1	5284	1382295	NP_041191.1	monopartite
			Totivirus	Saccharomyces cerevisiae virus L-A	yes	L-A	ScV-L-A	11008	NC_003745.1	4579	2651431	NP_620495.1	monopartite
			Trichomonasvirus	Trichomonas vaginalis virus 1	yes	genomic	TvV1	674953	NC_027701.1	4666	7831841	YP_009162330.1	monopartite
			Victoriavirus	Helminthosporium victoriae virus 190S	yes	genomic	HvV-190S	45237	NC_003607.2	5179	8901618	NP_619670.2	monopartite
			unclassified	Leptopilina boulardi Toti-like virus		genomic	LbTLV	1353795	NC_025218.2	8021	26642803	YP_009072448.1	monopartite
	Chrysoviridae	-	Chrysovirus	Penicillium chrysogenum virus	yes	genomic	PcV	158372	NC_007539.1	12640	15218197	YP_392482.1	quadripartite
	Quadriviridae	-	Quadrivirus	Rosellinia necatrix quadrivirus 1	yes	genomic	RnQV1	1000373	NC_016760.1	17078	22321722	YP_005097975.1	quadripartite
	Partitiviridae	-	Alphapartitivirus	White clover cryptic virus 1	yes	genomic	WCCV-1	292052	NC_006275.1	3663	15503214	YP_086754.1	bipartite
			Betapartitivirus	Atkinsonella hypoxylon virus	yes	genomic	AhV	37961	NC_003470.1	6105	7782774	NP_604475.1	tripartite
				Crimson clover cryptic virus 2	no	IPP IncarnatSK	CCCV2	1323528	JX971982.1	4798	23584419	AGJ83769.1	bipartite
			Cryspovirus	Cryptosporidium parvum virus 1	yes	HNJ1	CpV1	675060	LC015008.1	2520	26439535	BAU19329.1	bipartite
			Deltapartitivirus	Pepper cryptic virus 1	yes	PCV1-CHN	PCV1	369643	KX765307.1	3075	unpubl.	ASU63844.1	bipartite
			Gammapartitivirus	Penicillium stoloniferum virus S	yes	genome	PsV-S	216371	NC_005976.2	3336	14618085	YP_052856.2	bipartite
	Birnaviridae		Aquabirnavirus	Infectious pancreatic necrosis virus	yes	genome	IPNV	11002	NC_001916.1	5881	3737418	NP_047197.1	bipartite
			Avibirnavirus	Infectious bursal disease virus	yes	genome	IBDV	10995	NC_004179.1	5898	8725117	NP_690839.1	bipartite
			Blosnavirus	Blotched snakehead virus	yes	genome	BSV	311176	NC_005983.1	6179	12477876	YP_052864.1	bipartite
			Entomobirnavirus	Drosophila X virus	yes	genome	DXV	48981	NC_004169.1	6603	8918922	NP_690806.1	bipartite
			unclassified	Culex Y virus		P1-BS2010	CYV	1230254	JQ659255.1	6683	22875257	AFR34027.1	bipartite
	Unclassified			Shuangao toti-like virus		genomic	ShTLV	1923477	NC_032851.1	6891	27880757	YP_009336732.1	monopartite
				Hubei toti-like virus 19		genomic	HuTLV19	1923307	NC_032424.1	7198	27880757	YP_009333170.1	monopartite
				Sanxia water strider virus 20		genomic	SWSV20	1923404	NC_032931.1	7192	27880757	YP_009336893.1	monopartite

## Sheet: Baculoviridae+Nudiviridae
Family	Subfamily	Genus	Species	Type?	Strain	Acronym	Taxid	Genome	G.len	PMID	pif-2	lef-8	DNApol
Baculoviridae	-	Alphabaculovirus	Autographa californica multiple nucleopolyhedrovirus	yes	genomic	AcMNPV	46015	NC_001623.1	133894	8030224	NP_054051.1	NP_054079.1	NP_054095.1
			Helicoverpa armigera nucleopolyhedrovirus	no	genomic	HaNPV	51313	NC_003094.2	130759	12050807	NP_203689.1	NP_203594.1	NP_203622.1
			Bombyx mori nucleopolyhedrovirus	no	genomic	BmNPV	271108	NC_001962.1	128413	10355780	NP_047427.1	NP_047454.1	NP_047469.1
		Betabaculovirus	Cydia pomonella granulovirus	yes	genomic	CpGV	28289	NC_002816.1	123500	11562546	NP_148832.1	NP_148915.1	NP_148895.1
			Plodia interpunctella granulovirus	no	genomic	PiGV	262175	NC_032255.1	112536	27472489	YP_009330173.1	YP_009330246.1	YP_009330228.1
			Spodoptera frugiperda granulovirus	no	genomic	SfGV	307454	NC_026511.1	140913	25609309	YP_009121822.1	YP_009121909.1	YP_009121894.1
		Deltabaculovirus	Culex nigripalpus nucleopolyhedrovirus	yes	genomic	CnNPV	130556	NC_003084.1	108252	11602755	NP_203342.1	NP_203330.1	NP_203396.1
		Gammabaculovirus	Neodiprion lecontei nucleopolyhedrovirus	yes	genomic	NlNPV	249151	NC_005906.1	81755	15194779	YP_025252.1	YP_025279.1	YP_025217.1
Nudiviridae	-	Alphanudivirus	Oryctes rhinoceros nudivirus	yes	genomic	OrNV	92521	NC_011588.1	127615	18598718	YP_002321328.1	YP_002321375.1	YP_002321312.1
			Gryllus bimaculatus nudivirus	no	genomic	GbNV	432587	NC_009240.1	96944	17360757	YP_001111333.1	YP_001111316.1	YP_001111279.1
		Betanudivirus	Heliothis zea nudivirus	yes	genomic	HZV-1	29250	NC_004156.2	231621	22355451	YP_004956774.1	YP_004956799.1	YP_004956766.1
		unclassified	Kallithea virus	-	genomic	KV	1654582	NC_033829.1	152388	Webster	YP_009345958.1	YP_009345992.1	YP_009345924.1
			Penaeus monodon nudivirus	-	genomic	PmNV	1529056	NC_024692.1	119638	25063321	YP_009051853.1	YP_009051861.1	YP_009051843.1
			Tipula oleracea nudivirus	-	genomic	ToNV	1546257	NC_026242.1	145704	25540386	YP_009116654.1	YP_009116735.1	YP_009116659.1
